# Supplementary material for: Relict groups of spiny frogs indicate Late Paleogene-Early Neogene trans-Tibet dispersal of thermophile faunal elements
Source: PeerJ journal article supplement (doi:10.7717/peerj.11793), 2021-07-15
Supplement: suppl_TabS1_staff_KT.pdf [file suppl_TabS1_staff_KT.pdf]

**Supplemental Information Tab. S1**

**List of species used in the present study, including sample ID or voucher numbers, sample localities and GenBank accession numbers.** Locality identifier (Loc) refers to the Fig. 1. Coordinates are given in decimal degrees. § = samples of photographed specimens (see Fig. S1); \* = sample localities not shown in Fig. 1 because they lie far to SO China; for reference see map in Hofmann et al. (2019).

| Taxon                          | SampleID/voucher | Data origin         | Loc | N      | E       | 16S      | col      | rag1     |
|--------------------------------|------------------|---------------------|-----|--------|---------|----------|----------|----------|
| <i>Allopaa hazarensis</i>      | 9386             | This study          | a   | 34.295 | 73.258  | MW598397 | MW603002 | MW598465 |
| <i>Allopaa hazarensis</i>      | 9389             | This study          | a   | 34.295 | 73.258  | MW598398 | MW603003 | MW598466 |
| <i>Allopaa hazarensis</i>      | 9549             | This study          | b   | 33.951 | 73.468  | MW598393 | MW603004 | MW598461 |
| <i>Allopaa hazarensis</i>      | 9551             | This study          | c   | 33.940 | 73.465  | MW598394 | MW603005 | MW598462 |
| <i>Allopaa hazarensis</i>      | 9559             | This study          | d   | 34.785 | 71.986  | MW598395 | MW603006 | MW598463 |
| <i>Allopaa hazarensis</i>      | 9573             | This study          | d   | 34.785 | 71.986  | MW598396 | MW603007 | MW598464 |
| <i>Chrysopaa sternosignata</i> | USNM:Herp589844  | NCBI                | e   | 34.940 | 69.255  | MG700155 | MG699938 | —        |
| <i>N. aenea</i>                |                  | NCBI                | 3   | 22.336 | 103.844 | EU979830 | KR087830 | HM163609 |
| <i>N. cf. blanfordii</i>       | JS040529_NME     | Hofmann et al. 2019 | 29  | 27.617 | 87.233  | MN012067 | —        | MN032491 |
| <i>N. cf. blanfordii</i>       | JS040531_NME     | Hofmann et al. 2019 | 29  | 27.617 | 87.233  | MN012068 | —        | MN032492 |
| <i>N. cf. blanfordii</i>       | JS040532_NME     | Hofmann et al. 2019 | 29  | 27.617 | 87.233  | MN012069 | —        | MN032493 |
| <i>N. cf. blanfordii</i>       | JS040533_NME     | Hofmann et al. 2019 | 29  | 27.617 | 87.233  | MN012070 | —        | MN032494 |
| <i>N. cf. blanfordii</i>       | JS040534_NME     | Hofmann et al. 2019 | 29  | 27.617 | 87.233  | MN012071 | —        | MN032495 |
| <i>N. cf. blanfordii</i>       | JS040535_NME     | Hofmann et al. 2019 | 29  | 27.617 | 87.233  | MN012072 | —        | MN032496 |
| <i>N. cf. blanfordii</i>       | JS060520_NME     | Hofmann et al. 2019 | 28  | 27.173 | 87.421  | MN012073 | —        | MN032497 |
| <i>N. cf. blanfordii</i>       | JS060515_NME     | Hofmann et al. 2019 | 27  | 27.214 | 87.463  | MN012074 | —        | MN032498 |
| <i>N. cf. blanfordii</i>       | JS060508_NME     | Hofmann et al. 2019 | 25  | 27.413 | 87.734  | MN012075 | —        | MN032499 |
| <i>N. cf. ercepeae</i>         | A2016/13_NME     | Hofmann et al. 2019 | 67  | 29.374 | 81.137  | —        | MN012211 | —        |
| <i>N. cf. ercepeae</i>         | A2017/13_NME     | Hofmann et al. 2019 | 67  | 29.374 | 81.137  | MN012076 | MN012212 | MN032500 |
| <i>N. cf. ercepeae</i>         | A1_12_NME        | Hofmann et al. 2019 | 63  | 28.963 | 82.857  | MN012077 | MN012213 | MN032501 |
| <i>N. cf. ercepeae</i>         | A7_12_NME        | Hofmann et al. 2019 | 62  | 28.855 | 82.961  | MN012078 | MN012214 | MN032502 |
| <i>N. cf. ercepeae</i>         | A4_12_NME        | Hofmann et al. 2019 | 61  | 28.857 | 82.976  | MN012079 | MN012215 | MN032503 |
| <i>N. cf. ercepeae</i>         | A5_12_NME        | Hofmann et al. 2019 | 61  | 28.857 | 82.976  | MN012080 | MN012216 | MN032504 |
| <i>N. cf. ercepeae</i>         | A6_12_NME        | Hofmann et al. 2019 | 61  | 28.857 | 82.976  | MN012081 | MN012217 | MN032505 |
| <i>N. cf. polumini</i>         | R15_12_NME       | Hofmann et al. 2019 | 59  | 28.502 | 83.129  | MN012082 | MN012218 | MN032506 |
| <i>N. cf. polumini</i>         | R20_12_NME       | Hofmann et al. 2019 | 57  | 28.513 | 83.255  | MN012083 | —        | MN032507 |
| <i>N. cf. polumini</i>         | SH070507_NME     | Hofmann et al. 2019 | 50  | 28.060 | 85.294  | MN012084 | MN012219 | MN032508 |
| <i>N. cf. polumini</i>         | SH070509_NME     | Hofmann et al. 2019 | 49  | 28.080 | 85.295  | MN012085 | MN012220 | MN032509 |
| <i>N. cf. polumini</i>         | SH070531_NME     | Hofmann et al. 2019 | 46  | 27.965 | 85.472  | MN012086 | MN012221 | MN032510 |
| <i>N. cf. polumini</i>         | R3_09_13_NME     | Hofmann et al. 2019 | 51  | 28.380 | 84.065  | MN012087 | MN012222 | MN032511 |
| <i>N. cf. rarica</i>           | A1961/13_NME     | Hofmann et al. 2019 | 66  | 29.510 | 82.090  | MN012202 | MN012322 | —        |
| <i>N. cf. rarica</i>           | A1970/13_NME     | Hofmann et al. 2019 | 66  | 29.510 | 82.090  | MN012203 | MN012323 | MN032606 |
| <i>N. cf. rarica</i>           | A2015/13_NME     | Hofmann et al. 2019 | 66  | 29.510 | 82.090  | MN012204 | MN012324 | MN032607 |
| <i>N. cf. rarica</i>           | A2019/13_NME     | Hofmann et al. 2019 | 66  | 29.510 | 82.090  | MN012205 | MN012325 | MN032608 |
| <i>N. cf. rarica</i>           | A1965/13_NME     | Hofmann et al. 2019 | 65  | 29.513 | 82.092  | MN012206 | MN012326 | MN032609 |
| <i>N. cf. rarica</i>           | A1960/13_NME     | Hofmann et al. 2019 | 64  | 29.360 | 82.200  | MN012207 | MN012327 | —        |
| <i>N. cf. rostandi</i>         | R1_12_NME        | Hofmann et al. 2019 | 60  | 28.513 | 83.033  | MN012088 | MN012223 | MN032512 |
| <i>N. cf. rostandi</i>         | R2_12_NME        | Hofmann et al. 2019 | 60  | 28.513 | 83.033  | MN012089 | MN012224 | MN032513 |
| <i>N. cf. rostandi</i>         | R3_12_NME        | Hofmann et al. 2019 | 60  | 28.513 | 83.033  | MN012090 | MN012225 | MN032514 |
| <i>N. cf. rostandi</i>         | R4_12_NME        | Hofmann et al. 2019 | 60  | 28.513 | 83.033  | MN012091 | MN012226 | MN032515 |
| <i>N. cf. rostandi</i>         | R11_12_NME       | Hofmann et al. 2019 | 59  | 28.502 | 83.129  | MN012092 | MN012227 | MN032516 |

|                        |               |                     |    |        |         |          |          |          |
|------------------------|---------------|---------------------|----|--------|---------|----------|----------|----------|
| <i>N. cf. rostandi</i> | R12_12_NME    | Hofmann et al. 2019 | 59 | 28.502 | 83.129  | MN012093 | MN012228 | MN032517 |
| <i>N. cf. rostandi</i> | R13_12_NME    | Hofmann et al. 2019 | 59 | 28.502 | 83.129  | MN012094 | MN012229 | MN032518 |
| <i>N. cf. rostandi</i> | R14_12_NME    | Hofmann et al. 2019 | 59 | 28.502 | 83.129  | MN012095 | MN012230 | MN032519 |
| <i>N. cf. rostandi</i> | R16_12_NME    | Hofmann et al. 2019 | 59 | 28.502 | 83.129  | MN012096 | MN012231 | MN032520 |
| <i>N. cf. rostandi</i> | R6_12_NME     | Hofmann et al. 2019 | 59 | 28.502 | 83.129  | MN012097 | MN012232 | MN032521 |
| <i>N. cf. rostandi</i> | R7_12_NME     | Hofmann et al. 2019 | 59 | 28.502 | 83.129  | MN012098 | MN012233 | MN032522 |
| <i>N. cf. rostandi</i> | R8_12_NME     | Hofmann et al. 2019 | 59 | 28.502 | 83.129  | MN012099 | MN012234 | MN032523 |
| <i>N. cf. rostandi</i> | R9_12_NME     | Hofmann et al. 2019 | 59 | 28.502 | 83.129  | MN012100 | MN012235 | MN032524 |
| <i>N. cf. rostandi</i> | R17_12_NME    | Hofmann et al. 2019 | 56 | 28.519 | 83.264  | MN012101 | MN012236 | MN032525 |
| <i>N. cf. rostandi</i> | SH070550_NME  | Hofmann et al. 2019 | 55 | 28.683 | 83.591  | MN012102 | —        | MN032526 |
| <i>N. cf. rostandi</i> | SH070538_NME  | Hofmann et al. 2019 | 54 | 28.680 | 83.594  | MN012103 | —        | MN032527 |
| <i>N. chayuensis</i>   | SCUM050410CHX | NCBI                | 12 | 25.823 | 98.858  | EU979838 | —        | HM163587 |
| <i>N. conaensis</i>    | KIZ-YP152     | NCBI                | 16 | 27.991 | 91.957  | EU979834 | —        | HM163589 |
| <i>N. liebighii</i>    | A17_12_NME    | Hofmann et al. 2019 | 56 | 28.519 | 83.264  | MN012104 | MN012237 | MN032528 |
| <i>N. liebighii</i>    | R18_12_NME    | Hofmann et al. 2019 | 56 | 28.519 | 83.264  | MN012105 | MN012238 | MN032529 |
| <i>N. liebighii</i>    | SH070515_NME  | Hofmann et al. 2019 | 47 | 28.099 | 85.317  | MN012106 | —        | MN032530 |
| <i>N. liebighii</i>    | SH0805109_NME | Hofmann et al. 2019 | 45 | 27.673 | 86.240  | MN012107 | —        | MN032531 |
| <i>N. liebighii</i>    | SH080506_NME  | Hofmann et al. 2019 | 42 | 27.609 | 86.295  | MN012108 | —        | MN032532 |
| <i>N. liebighii</i>    | SH080554_NME  | Hofmann et al. 2019 | 41 | 27.718 | 86.311  | MN012109 | —        | MN032533 |
| <i>N. liebighii</i>    | SH080536_NME  | Hofmann et al. 2019 | 38 | 27.691 | 86.343  | MN012110 | MN012239 | —        |
| <i>N. liebighii</i>    | SH080537_NME  | Hofmann et al. 2019 | 38 | 27.691 | 86.343  | MN012111 | MN012240 | MN032534 |
| <i>N. liebighii</i>    | SH080538_NME  | Hofmann et al. 2019 | 38 | 27.691 | 86.343  | MN012112 | —        | MN032535 |
| <i>N. liebighii</i>    | SH080524_NME  | Hofmann et al. 2019 | 37 | 27.694 | 86.351  | MN012113 | MN012241 | MN032536 |
| <i>N. liebighii</i>    | SH080534_NME  | Hofmann et al. 2019 | 37 | 27.694 | 86.351  | MN012114 | —        | MN032537 |
| <i>N. liebighii</i>    | Ne16_13_NME   | Hofmann et al. 2019 | 36 | 27.584 | 86.411  | MN012115 | MN012242 | MN032538 |
| <i>N. liebighii</i>    | Ne17_13_NME   | Hofmann et al. 2019 | 36 | 27.584 | 86.411  | MN012116 | MN012243 | MN032539 |
| <i>N. liebighii</i>    | Ne12_13_NME   | Hofmann et al. 2019 | 34 | 27.584 | 86.594  | MN012117 | MN012244 | MN032540 |
| <i>N. liebighii</i>    | Ne10_13_NME   | Hofmann et al. 2019 | 33 | 27.586 | 86.635  | MN012118 | MN012245 | MN032541 |
| <i>N. liebighii</i>    | JS040512_NME  | Hofmann et al. 2019 | 30 | 27.631 | 87.224  | MN012119 | MN012246 | MN032542 |
| <i>N. liebighii</i>    | JS040513_NME  | Hofmann et al. 2019 | 30 | 27.631 | 87.224  | MN012120 | MN012247 | MN032543 |
| <i>N. liebighii</i>    | JS060518_NME  | Hofmann et al. 2019 | 28 | 27.173 | 87.421  | MN012121 | —        | MN032544 |
| <i>N. liebighii</i>    | JS060511_NME  | Hofmann et al. 2019 | 26 | 27.296 | 87.535  | MN012122 | —        | MN032545 |
| <i>N. liebighii</i>    | JS060509_NME  | Hofmann et al. 2019 | 25 | 27.413 | 87.734  | MN012123 | —        | MN032546 |
| <i>N. liebighii</i>    | JS060502_NME  | Hofmann et al. 2019 | 24 | 27.407 | 87.752  | —        | —        | MN032547 |
| <i>N. liebighii</i>    | JS060503_NME  | Hofmann et al. 2019 | 24 | 27.407 | 87.752  | MN012124 | —        | MN032548 |
| <i>N. liebighii</i>    | KIZ-RDXZL1    | NCBI                | 23 | 27.485 | 88.907  | DQ118499 | KJ810987 | HM163607 |
| <i>N. maculosa</i>     | YNU-HU2002308 | NCBI                | 8  | 24.400 | 100.800 | EU979835 | —        | HM163588 |
| <i>N. medogensis</i>   | SYNU-XZ35     | NCBI                | 13 | 29.367 | 95.583  | DQ118506 | —        | HM163590 |
| <i>N. parkeri</i>      | N6_06_NME     | Hofmann et al. 2019 | 22 | 29.589 | 90.214  | MN012125 | MN012248 | —        |
| <i>N. parkeri</i>      | N7_06_NME     | Hofmann et al. 2019 | 22 | 29.589 | 90.214  | MN012126 | MN012249 | MN032549 |
| <i>N. parkeri</i>      | N8_06_NME     | Hofmann et al. 2019 | 22 | 29.589 | 90.214  | MN012127 | MN012250 | MN032550 |
| <i>N. parkeri</i>      | N5_06_NME     | Hofmann et al. 2019 | 21 | 29.573 | 90.433  | MN012128 | MN012251 | —        |
| <i>N. parkeri</i>      | TP10_06_NME   | Hofmann et al. 2019 | 21 | 29.573 | 90.433  | MN012129 | MN012252 | —        |
| <i>N. parkeri</i>      | TP11_06_NME   | Hofmann et al. 2019 | 21 | 29.573 | 90.433  | MN012130 | MN012253 | —        |
| <i>N. parkeri</i>      | TP8_06_NME    | Hofmann et al. 2019 | 21 | 29.573 | 90.433  | —        | MN012254 | —        |
| <i>N. parkeri</i>      | TP9_06_NME    | Hofmann et al. 2019 | 21 | 29.573 | 90.433  | MN012131 | MN012255 | —        |
| <i>N. parkeri</i>      | N10_06_NME    | Hofmann et al. 2019 | 20 | 29.578 | 90.435  | MN012132 | MN012256 | —        |
| <i>N. parkeri</i>      | N9_06_NME     | Hofmann et al. 2019 | 20 | 29.578 | 90.435  | MN012133 | MN012257 | MN032551 |
| <i>N. parkeri</i>      | TP1_06_NME    | Hofmann et al. 2019 | 20 | 29.578 | 90.435  | MN012134 | MN012258 | MN032552 |
| <i>N. parkeri</i>      | TP2_06_NME    | Hofmann et al. 2019 | 20 | 29.578 | 90.435  | MN012135 | —        | MN032553 |

|                         |                |                     |    |        |         |          |          |          |
|-------------------------|----------------|---------------------|----|--------|---------|----------|----------|----------|
| <i>N. parkeri</i>       | TP3_06_NME     | Hofmann et al. 2019 | 20 | 29.578 | 90.435  | MN012136 | MN012259 | —        |
| <i>N. parkeri</i>       | CAS801L        | Hofmann et al. 2019 | 19 | 30.090 | 90.480  | MN012137 | MN012260 | MN032554 |
| <i>N. parkeri</i>       | CAS802L        | Hofmann et al. 2019 | 19 | 30.090 | 90.480  | MN012138 | MN012261 | MN032555 |
| <i>N. parkeri</i>       | CAS803L        | Hofmann et al. 2019 | 19 | 30.090 | 90.480  | MN012139 | MN012262 | —        |
| <i>N. parkeri</i>       | CAS804L        | Hofmann et al. 2019 | 19 | 30.090 | 90.480  | MN012140 | MN012263 | —        |
| <i>N. parkeri</i>       | CAS805L        | Hofmann et al. 2019 | 19 | 30.090 | 90.480  | MN012141 | MN012264 | —        |
| <i>N. parkeri</i>       | A6AL_NME       | Hofmann et al. 2019 | 18 | 30.156 | 90.647  | MN012142 | —        | —        |
| <i>N. parkeri</i>       | JS0507B01_NME  | Hofmann et al. 2019 | 17 | 30.378 | 90.908  | MN012143 | MN012265 | MN032556 |
| <i>N. parkeri</i>       | JS0507B02_NME  | Hofmann et al. 2019 | 17 | 30.378 | 90.908  | MN012144 | MN012266 | MN032557 |
| <i>N. parkeri</i>       | JS0507B03_NME  | Hofmann et al. 2019 | 17 | 30.378 | 90.908  | MN012145 | MN012267 | MN032558 |
| <i>N. parkeri</i>       | JS0507B04_NME  | Hofmann et al. 2019 | 17 | 30.378 | 90.908  | MN012146 | MN012268 | MN032559 |
| <i>N. parkeri</i>       | JS0507B05_NME  | Hofmann et al. 2019 | 17 | 30.378 | 90.908  | MN012147 | MN012269 | MN032560 |
| <i>N. parkeri</i>       |                | NCBI                | 17 | 30.378 | 90.908  | KP317482 | KP317482 | HM163584 |
| <i>N. parkeri</i>       | N1_06_NME      | Hofmann et al. 2019 | 15 | 31.166 | 92.061  | MN012148 | MN012270 | —        |
| <i>N. parkeri</i>       | N2_06_NME      | Hofmann et al. 2019 | 15 | 31.166 | 92.061  | MN012149 | MN012271 | —        |
| <i>N. parkeri</i>       | N3_06_NME      | Hofmann et al. 2019 | 15 | 31.166 | 92.061  | MN012150 | MN012272 | MN032561 |
| <i>N. parkeri</i>       | N4_06_NME      | Hofmann et al. 2019 | 15 | 31.166 | 92.061  | MN012151 | MN012273 | —        |
| <i>N. parkeri</i>       | TP4_06_NME     | Hofmann et al. 2019 | 15 | 31.166 | 92.061  | MN012152 | MN012274 | —        |
| <i>N. parkeri</i>       | TP5_06_NME     | Hofmann et al. 2019 | 15 | 31.166 | 92.061  | MN012153 | MN012275 | —        |
| <i>N. parkeri</i>       | TP6_06_NME     | Hofmann et al. 2019 | 15 | 31.166 | 92.061  | MN012154 | MN012276 | —        |
| <i>N. parkeri</i>       | TP7_06_NME     | Hofmann et al. 2019 | 15 | 31.166 | 92.061  | MN012155 | MN012277 | —        |
| <i>N. parkeri</i>       | CIB-XM1096     | NCBI                | 14 | 29.649 | 94.361  | DQ118498 | KJ811345 | —        |
| <i>N. pleskei</i>       | KQ47_14_NME    | Hofmann et al. 2019 | 6  | 30.216 | 101.500 | MN012156 | MN012278 | MN032562 |
| <i>N. pleskei</i>       | KQ1_14_NME     | Hofmann et al. 2019 | 5  | 30.377 | 101.675 | MN012157 | MN012279 | MN032563 |
| <i>N. pleskei</i>       | KQ10_14_NME    | Hofmann et al. 2019 | 5  | 30.377 | 101.675 | MN012158 | MN012280 | MN032564 |
| <i>N. pleskei</i>       | KQ11_14_NME    | Hofmann et al. 2019 | 5  | 30.377 | 101.675 | MN012159 | MN012281 | MN032565 |
| <i>N. pleskei</i>       | KQ13_14_NME    | Hofmann et al. 2019 | 5  | 30.377 | 101.675 | MN012160 | MN012282 | MN032566 |
| <i>N. pleskei</i>       | KQ15_14_NME    | Hofmann et al. 2019 | 5  | 30.377 | 101.675 | MN012161 | MN012283 | —        |
| <i>N. pleskei</i>       | KQ17_14_NME    | Hofmann et al. 2019 | 5  | 30.377 | 101.675 | MN012162 | MN012284 | MN032567 |
| <i>N. pleskei</i>       | KQ18_14_NME    | Hofmann et al. 2019 | 5  | 30.377 | 101.675 | MN012163 | MN012285 | MN032568 |
| <i>N. pleskei</i>       | KQ19_14_NME    | Hofmann et al. 2019 | 5  | 30.377 | 101.675 | MN012164 | MN012286 | —        |
| <i>N. pleskei</i>       | KQ20_14_NME    | Hofmann et al. 2019 | 5  | 30.377 | 101.675 | MN012165 | MN012287 | MN032569 |
| <i>N. pleskei</i>       | KQ9_14_NME     | Hofmann et al. 2019 | 5  | 30.377 | 101.675 | MN012166 | MN012288 | —        |
| <i>N. pleskei</i>       | CAS201         | Hofmann et al. 2019 | 4  | 33.467 | 102.750 | MN012167 | MN012289 | MN032570 |
| <i>N. pleskei</i>       | CAS202         | Hofmann et al. 2019 | 4  | 33.467 | 102.750 | MN012168 | MN012290 | MN032571 |
| <i>N. pleskei</i>       |                | NCBI                | 4  | 33.467 | 102.750 | HQ324232 | HQ324232 | HM163586 |
| <i>N. quadrans</i>      | SCUM20045195CJ | NCBI                | 2  | 31.683 | 103.850 | DQ118514 | —        | HM163591 |
| <i>Nanorana</i> sp. [A] | R5_12_NME      | Hofmann et al. 2019 | 60 | 28.513 | 83.033  | MN012169 | MN012291 | MN032572 |
| <i>Nanorana</i> sp. [A] | R10_12_NME     | Hofmann et al. 2019 | 59 | 28.502 | 83.129  | MN012170 | —        | MN032573 |
| <i>Nanorana</i> sp. [A] | KQ2_12_NME     | Hofmann et al. 2019 | 58 | 28.501 | 83.198  | MN012171 | MN012292 | MN032574 |
| <i>Nanorana</i> sp. [A] | SH070556_NME   | Hofmann et al. 2019 | 53 | 28.622 | 83.662  | MN012172 | MN012293 | MN032575 |
| <i>Nanorana</i> sp. [A] | A1963/13_NME   | Hofmann et al. 2019 | 52 | 28.400 | 83.700  | MN012173 | MN012294 | —        |
| <i>Nanorana</i> sp. [B] | R1_09_13_NME   | Hofmann et al. 2019 | 51 | 28.380 | 84.065  | MN012174 | MN012295 | MN032576 |
| <i>Nanorana</i> sp. [B] | R2_09_13_NME   | Hofmann et al. 2019 | 51 | 28.380 | 84.065  | MN012175 | MN012296 | MN032577 |
| <i>Nanorana</i> sp. [B] | R4_09_13_NME   | Hofmann et al. 2019 | 51 | 28.380 | 84.065  | MN012176 | MN012297 | MN032578 |
| <i>Nanorana</i> sp. [B] | SH070510_NME   | Hofmann et al. 2019 | 48 | 28.074 | 85.302  | MN012177 | —        | MN032579 |
| <i>Nanorana</i> sp. [C] | SH080591_NME   | Hofmann et al. 2019 | 44 | 27.686 | 86.252  | MN012178 | MN012298 | MN032580 |
| <i>Nanorana</i> sp. [C] | SH080592_NME   | Hofmann et al. 2019 | 44 | 27.686 | 86.252  | MN012179 | MN012299 | MN032581 |
| <i>Nanorana</i> sp. [C] | SH080593_NME   | Hofmann et al. 2019 | 44 | 27.686 | 86.252  | MN012180 | MN012300 | MN032582 |
| <i>Nanorana</i> sp. [C] | SH080594_NME   | Hofmann et al. 2019 | 44 | 27.686 | 86.252  | MN012181 | MN012301 | MN032583 |

|                                |                       |                     |     |        |         |           |           |          |
|--------------------------------|-----------------------|---------------------|-----|--------|---------|-----------|-----------|----------|
| <i>Nanorana</i> sp. [C]        | SH080570_NME          | Hofmann et al. 2019 | 43  | 27.697 | 86.275  | MN012182  | MN012302  | MN032584 |
| <i>Nanorana</i> sp. [C]        | SH080571_NME          | Hofmann et al. 2019 | 43  | 27.697 | 86.275  | MN012183  | MN012303  | MN032585 |
| <i>Nanorana</i> sp. [C]        | SH080572_NME          | Hofmann et al. 2019 | 43  | 27.697 | 86.275  | MN012184  | MN012304  | MN032586 |
| <i>Nanorana</i> sp. [C]        | SH080553_NME          | Hofmann et al. 2019 | 41  | 27.718 | 86.311  | MN012185  | MN012305  | MN032587 |
| <i>Nanorana</i> sp. [C]        | SH080555_NME          | Hofmann et al. 2019 | 41  | 27.718 | 86.311  | MN012186  | MN012306  | MN032588 |
| <i>Nanorana</i> sp. [C]        | SH080545_NME          | Hofmann et al. 2019 | 40  | 27.703 | 86.337  | MN012187  | MN012307  | MN032589 |
| <i>Nanorana</i> sp. [C]        | SH080546_NME          | Hofmann et al. 2019 | 40  | 27.703 | 86.337  | MN012188  | MN012308  | MN032590 |
| <i>Nanorana</i> sp. [C]        | SH080548_NME          | Hofmann et al. 2019 | 40  | 27.703 | 86.337  | MN012189  | MN012309  | MN032591 |
| <i>Nanorana</i> sp. [C]        | SH080551_NME          | Hofmann et al. 2019 | 40  | 27.703 | 86.337  | MN012190  | MN012310  | MN032592 |
| <i>Nanorana</i> sp. [C]        | SH080552_NME          | Hofmann et al. 2019 | 40  | 27.703 | 86.337  | MN012191  | MN012311  | —        |
| <i>Nanorana</i> sp. [C]        | SH080512_NME          | Hofmann et al. 2019 | 39  | 27.595 | 86.340  | MN012192  | MN012312  | MN032593 |
| <i>Nanorana</i> sp. [C]        | SH080523_NME          | Hofmann et al. 2019 | 37  | 27.694 | 86.351  | MN012193  | MN012313  | MN032594 |
| <i>Nanorana</i> sp. [C]        | Ne13_13_NME           | Hofmann et al. 2019 | 35  | 27.576 | 86.514  | MN012194  | MN012314  | MN032595 |
| <i>Nanorana</i> sp. [C]        | Ne1_13_NME            | Hofmann et al. 2019 | 32  | 27.689 | 86.731  | MN012195  | MN012315  | MN032596 |
| <i>Nanorana</i> sp. [C]        | Ne2_13_NME            | Hofmann et al. 2019 | 32  | 27.689 | 86.731  | MN012196  | MN012316  | MN032597 |
| <i>Nanorana</i> sp. [C]        | Ne9_13_NME            | Hofmann et al. 2019 | 31  | 27.671 | 86.765  | MN012197  | MN012317  | MN032598 |
| <i>Nanorana</i> sp. [Chainpur] | A1966/13_NME          | Hofmann et al. 2019 | 67  | 29.374 | 81.137  | MN012198  | MN012318  | MN032599 |
| <i>N. vicina</i>               | 2Bhan_RAS             | Hofmann et al. 2019 | 74  | 32.873 | 75.858  | MN012199  | MN012319  | —        |
| <i>N. vicina</i>               | 1G_RAS                | Hofmann et al. 2019 | 73  | 32.777 | 75.947  | —         | MN012320  | MN032600 |
| <i>N. vicina</i>               | 1Pa_RAS <sup>§</sup>  | Hofmann et al. 2019 | 72  | 32.528 | 75.991  | —         | MN012321  | MN032601 |
| <i>N. vicina</i>               | 2Ba_RAS               | Hofmann et al. 2019 | 71  | 31.783 | 77.068  | —         | —         | MN032602 |
| <i>N. vicina</i>               | 2Baj_RAS              | Hofmann et al. 2019 | 70  | 31.821 | 77.112  | —         | —         | MN032603 |
| <i>N. vicina</i>               | 2Pul_RAS <sup>§</sup> | Hofmann et al. 2019 | 69  | 31.996 | 77.448  | MN012200  | —         | MN032604 |
| <i>N. vicina</i>               | 782_RAS <sup>§</sup>  | Hofmann et al. 2019 | 68  | 31.261 | 77.450  | MN012201  | —         | MN032605 |
| <i>N. taihangnica</i>          |                       | NCBI                | 1   | 35.265 | 112.090 | KF199146  | KF199146  | HM163608 |
| <i>N. unculuanus</i>           | YNUHU2002502601       | NCBI                | 7   | 24.447 | 100.834 | DQ118491  | —         | HM163595 |
| <i>N. ventripunctata</i>       | SCUM045887WD          | NCBI                | 11  | 27.830 | 99.701  | EU979839  | KJ810985  | HM163585 |
| <i>N. ventripunctata</i>       | SH050538_NME          | Hofmann et al. 2019 | 10  | 27.788 | 99.855  | MN012208  | MN012328  | MN032610 |
| <i>N. ventripunctata</i>       | SH050539_NME          | Hofmann et al. 2019 | 10  | 27.788 | 99.855  | MN012209  | MN012329  | MN032611 |
| <i>N. yunnanensis</i>          |                       | NCBI                | 9   | 27.724 | 100.789 | KF199150  | KF199150  | HM163593 |
| <i>Q. boulengeri</i>           | YNU-HU20025106        | NCBI                | 80  | 28.811 | 105.831 | KX645665  | KX645665  | HM163604 |
| <i>Q. delacouri</i>            | FMNH255623            | NCBI                | 82  | 19.018 | 104.799 | EU979810  | EU979664  | HM163600 |
| <i>Q. exilispinosa</i>         | KF199151              | NCBI                | 81* | 22.396 | 114.109 | KF199151  | KF199151  | HM163610 |
| <i>Q. jiulongensis</i>         | KF199149              | NCBI                | 75* | 27.750 | 117.683 | KF199149  | KF199149  | HM163603 |
| <i>Q. shini</i>                | KF199148              | NCBI                | 76  | 25.598 | 109.935 | KF199148  | KF199148  | HM163602 |
| <i>Q. spinosa</i>              |                       | NCBI                | 77  | 24.481 | 99.047  | NC_013270 | NC_013270 | HM163606 |
| <i>Q. verrucospinosa</i>       |                       | NCBI                | 78  | 21.789 | 101.142 | KF199147  | KF199147  | HM163599 |
| <i>Q. yei</i>                  | HNNU0908I061          | NCBI                | 79* | 31.798 | 115.407 | KJ842105  | KJ842105  | HM163596 |
| <i>Fejervarya cancrivora</i>   |                       | NCBI                |     |        |         | EU652694  | EU652694  | HM163581 |
| <i>Hoplobatrachus</i>          |                       | NCBI                |     |        |         | NC_019615 | NC_019615 | HM163612 |
| <i>Limnectes fragilis</i>      | ZNAC11006             | NCBI                |     |        |         | AY899241  | AY899241  | HM163611 |

## Reference

Hofmann, S. et al. Phylogeny of spiny frogs *Nanorana* (Anura: Dicroglossidae) supports a Tibetan origin of a Himalayan species group. *Ecol Evol* 9, 14498-14511, doi:10.1002/ece3.5909 (2019).
